# Supplementary material
Source: publisher figshare collection journal article supplement (https://acs.figshare.com/ndownloader/files/18033956)
Supplement: Supplementary file 1 [file 18033956]

Supporting information for:

**Seabird-transported contaminants are reflected  
in the Arctic tundra, but not in its soil-dwelling  
springtails (Collembola)**

Silje M Kristiansen<sup>1</sup>, Hans P Leinaas<sup>1</sup>, Dorte Herzke<sup>3</sup>, Ketil Hylland<sup>1</sup>, Geir W Gabrielsen<sup>2</sup>,  
Mikael Harju<sup>3</sup>, Katrine Borgå<sup>1\*</sup>

<sup>1</sup>Department of Biosciences, University of Oslo (UiO), 0316 Oslo, Norway

<sup>2</sup>Norwegian Polar Institute (NPI), Fram Centre, 9296 Tromsø, Norway

<sup>3</sup>Norwegian Institute for Air Research (NILU), Fram Centre, 9296 Tromsø, Norway

\* Corresponding author: [katrine.borga@ibv.uio.no](mailto:katrine.borga@ibv.uio.no)

Supporting information includes 5 bodies of text, 4 figures and 3 tables, on a total of 18  
pages.

|    |                                                        |
|----|--------------------------------------------------------|
| 23 | <b>Content:</b>                                        |
| 24 | <b>S1. Determination of lipid-soluble contaminants</b> |
| 25 | <b>S2. Determination of PFASs</b>                      |
| 26 | <b>S3. Determination of Hg</b>                         |
| 27 | <b>S4. Quality assurance</b>                           |
| 28 | <b>S5. Stable isotope analysis</b>                     |
| 29 | <b>S6. Exclusion of PFAS</b>                           |
| 30 | <b>S7. Principal component analyses</b>                |

31 **Figure S1.**

32 **Figure S2.**

33 **Figure S3.**

34 **Figure S4.**

35 **Table S1.**

36 **Table S2.**

37 **Table S3.**

38

## 39 **S1. Determination of lipid-soluble contaminants**

40 Solvents applied during the extraction and clean-up prior to analysis of POPs were of

41 SupraSolv® grade, purchased from Merck, Darmstadt, Germany.

42 Lipid-associated contaminants were extracted from substrate samples using Soxhlet  
 43 extraction. Borosilicate fibre glass extraction thimbles (603 g, 25 mm x 100 mm) were burned  
 44 at 450°C for 8 hours. Approximately 10 g of substrate homogenates were weighed into the  
 45 thimbles, ~20 g material for Ny-Ålesund samples, and spiked with 21-211 ng internal  
 46 standard containing <sup>13</sup>C labelled PCBs, OCPs, and PBDEs. The thimbles were covered with  
 47 cotton, prewashed with dichloromethane (DCM). Round bottomed flasks were filled with 210

48 mL of toluene, and the extraction was run for 17–24 hours per sample, with four cycles per  
49 hour. Sulphur was removed from the soil/moss to avoid analytical disturbance by adding 1 g  
50 activated (acid-washed) granulated copper to the solvent. Extracts were concentrated using  
51 TurboVap® 500 Evaporation System (Caliper Life Sciences, Mountain View, USA), before  
52 transferred to glass centrifuge tubes, using n-hexane and DCM to dissolve sample material  
53 from the glass walls, ensuring transfer of the complete sample. Samples were then re-  
54 concentrated with RapidVap® Vacuum Dry Evaporation System (Labconco, Kansas City,  
55 USA) until almost dry, and supplemented with a few drops of isooctane. The first clean-up  
56 step was performed with multi-bed solid phase extraction (SPE) cartridges (Supelclean™ EZ-  
57 POP NP, 54341-U, Supelco, Sigma-Aldrich, Bellefonte, US) in a SPE station. The samples  
58 were added to cartridges using isooctane and acetonitrile to dissolve sample material from the  
59 glass walls, and each cartridge was added 5 mL acetonitrile. This was repeated 3 times. The  
60 contaminant extracts were re-concentrated using RapidVap® to 0.1 mL, added n-hexane to  
61 0.7 mL and mixed using a vortex mixer. As extracts contained more matrix than preferable,  
62 samples were split into two sub-samples and diluted with n-hexane to a total of 0.7 mL. The  
63 second clean-up step was carried out with Zymark RapidTrace SPE Workstation (Caliper Life  
64 Sciences, Mountain View, USA). SilactSPE™ columns (Affinisep, Paris, France) were  
65 loaded with 1.0 g Florisil® (0.15–0.25 mm), between two glass fibre frits. The samples were  
66 automatically loaded into a separate SPE column and eluted with 6 mL 10% DCM/hexane  
67 (mobile phase). Sub-samples were merged and concentrated to 0.2 mL with RapidVap®.  
68 Samples were transferred to gas-chromatograph (GC) vials with a micro-volume insert using  
69 isooctane and concentrated to 50 µL using a N<sub>2</sub> evaporator (N<sub>2</sub> purity 99.995%, quality 5.0,  
70 Yara Praxair AS, Porsgrunn, Norway). Samples were added a recovery standard (20 µL of <sup>13</sup>C  
71 PCB 159, 213 pg/µL), before mixed with a vortex mixer and stored at 4°C until analysis.

Springtail samples were homogenized using a mortar and pestle, before extracted for lipid-soluble contaminants using cold column extraction. Homogenates were weighed (1.99 g–3.59 g) and added sodium sulfate ( $\text{Na}_2\text{SO}_4$ ) until all had a similar dry consistency (1:10), before further homogenised with a metal spatula, and left at  $-20^\circ\text{C}$  overnight to dry. Samples were acclimatized to room temperature before re-homogenised with a spatula. Homogenates were transferred to glass columns and spiked with 200  $\mu\text{L}$  of the internal standard containing  $^{13}\text{C}$  labelled PCBs, OCPs, and PBDEs. Cyclohexane:acetone (50 mL, 3:1) were added to the column, which was closed when the solvents had permeated the whole sample, and opened after 30 min letting the solvent run through. This was repeated 2 times. Extracts were concentrated to 1–2 mL, using TurboVap®. The concentrated extracts were transferred to pre-weighed glass containers, using n-hexane and DCM to dissolve sample material from the glass walls. Extracts with solvents were re-concentrated using RapidVap® until only remaining matrix, and lipid content was determined gravimetrically. The clean-up steps were completed in the same manner as described for substrate samples.

Separation and detection of PCBs in substrate and springtails were conducted with a gas chromatograph-mass spectrometer (GC-MS) quadrupole instrument (Agilent, Santa Clara, CA, USA, GC 7890, MSD 5975C), in electron ionization mode, and in single ion monitoring mode. For separation of compounds, a 1  $\mu\text{L}$  aliquot of the sample was injected in splitless mode ( $250^\circ\text{C}$ , non-tapered liner), with helium as the carrier gas at a flow rate of 1.5 mL/min. The following temperature program was applied:  $70^\circ\text{C}$  for 2 min, followed by an increase of  $15^\circ\text{C}/\text{min}$  until reaching  $180^\circ\text{C}$ , an increase of  $5^\circ\text{C}/\text{min}$  to  $280^\circ\text{C}$ , before holding  $280^\circ\text{C}$  constant for 5 min. Analyses were conducted on a DB-5 MS column (length 30 m,  $0.25\text{ }\mu\text{m}$  film thickness, 0.25 mm inner diameter). The MS transfer line temperature held at  $300^\circ\text{C}$  and ion source temperature was set to  $230^\circ\text{C}$ . The analysis of OCPs was performed in negative chemical ionization mode, with helium as carrier gas at a flow rate of 1.0 mL/min. Sample

aliquots of 2 µl were injected in splitless mode at 220°C (glass wool liner). Temperatures were programmed as: 80°C was held for 2 min, followed by an increase of 20°C/min until reaching 100°C, held for 5 min, before an increase of 20°C/min to 170°C, held for 3 min, before a final increase of 20°C/min to 300°C, held for 2 min. Analyses were performed on an Agilent Ultra2 column (length 25 m, 0.11 µm film thickness, 0.20 mm inner diameter). The MS transfer line temperature held at 300°C and ion source temperature was set to 160°C. PBDEs were analysed in electron ionization mode and single ion monitoring mode with a Waters Quattro Micro GC-MS (Waters Corp., MA, USA). Helium was applied as carrier gas (flow rate of 1.6 mL/min), with a 5 µl sample injection volume in splitless mode at 300°C. The temperature program used for these contaminants was: 85°C initially held for 1 min, then an increase of 21°C/min to 210°C, followed by 9°C/min increase until a final 310°C, kept for 5 min. Analyses were conducted with a Restek 1614 column (length 15 m, 0.25 µm film thickness, 0.25 mm inner diameter), with a 5 m x 0.32 mmID pre-column and a pressfit inbetween.

## **S2. Determination of PFASs**

Substrate and springtails were analysed for PFASs following a method developed by Powley et al. (2005) with modifications [1]. Solvents applied during the extraction and clean-up were of LiChrosolv® grade, purchased from Merck, Darmstadt, Germany.

Substrate homogenates (5.0–5.8 g) and springtail homogenates (0.5–2.4 g) were placed in 50 mL polypropylene (PP)-centrifuge tubes before spiked with 20 µL of internal standard (0.5 ng/µL <sup>13</sup>C PFAS mix). One mL of 200 mM sodium hydroxide (NaOH) in methanol was added, and the samples were left resting for 30 min. They were then added 100 µL of 2 M hydrogen chloride (HCl) in methanol, and additionally 9 mL of methanol before mixed using a vortex mixer. PFASs were extracted by ultrasonic treatment (Branson 5510,

Branson Ultrasonics Corp., Conneticut, USA), three treatments of 10 min with 15 sec of mixing using a vortex mixer in between. The samples were centrifuged at 2000 rpm for 5 min, and the supernatants were transferred to new 15 mL PP-tubes, before concentrated to 2 mL (1 mL for springtails) using RapidVap®. Approximately 1 mL (0.8 mL for springtails) of the extracts were transferred to 1.5 mL Eppendorf tubes containing 25 mg Envi-Carb graphitized carbon adsorbent and 50 µL fresh anhydrous glacial acetic acid before mixed using a vortex mixer. The tubes were centrifuged at 10,000 rpm for 10 min, and 0.5 mL of the supernatant were transferred to a 1.5 mL glass vial, before added 20 µL of recovery standard (0.25 ng/µL 3,7-dimethyl PFOA; branched PFDcA in methanol) and mixed using a vortex mixer. An aliquot of 50 µL (100 µL for springtails) of the extract was transferred to a liquid chromatography (LC) vial with a micro-volume insert and diluted 1:1 with 2 mM aqueous ammonium acetate (NH<sub>4</sub>OAc, ≥99%). Samples were stored at 4°C until analysis. PFASs in substrate and springtails were analysed and quantified according to the procedure described in detail in Hanssen et al., 2013 [2].

### **S3. Determination of Hg**

Substrate samples were air-dried at room temperature for 3 days prior to extraction of Hg, while no pre-treatment was conducted for springtail samples, before analysed for Total Hg by the Norwegian Institute for Air Research (NILU, Kjeller, Norway). Approximately 0.5 g substrate and 0.25-0.68 g springtails were weighed accurately on a Mettler PG503 balance and added 5 mL nitric acid (HNO<sub>3</sub>, s.p.) and 3 mL deionized water (MilliQ). The samples were extracted according to a 65 min. temperature programme, with stepwise heating to 250°C and a hold time at this temperature for 30 min. After cooling, the samples were quantitatively transferred to polyethylene tubes, diluted with deionized water to a total volume of 50 mL, and topped with 250 µL hydrochloric acid (HCl, s.p.). Blank samples and

certified reference material (CRM) were prepared and analysed in every run. Prior to analysis, internal standards ( $^{115}\text{In}$ ) were added to all samples. Control samples traceable to National Institute of Standards and Technology (NIST) were used to verify all calibration curves. Hg measurements were performed using an inductively coupled plasma mass spectrometer (ICP-MS) from Agilent, USA (Agilent, 7700x).

#### **S4. Quality assurance**

Quantification of organic compounds was performed with the internal-standard method with isotope-labelled OCs, PBDEs, and PFASs. Control parameters included internal standards, recovery standards, solvent blanks, and standard reference materials (SRMs) or reference samples, to ensure accurate and reliable measurements. For substrate samples, the SRMs in the POPs analyses consisted of 0.5 g sediment (SRM 1944 – New York/New Jersey Waterway Sediment (NIST)). For springtail samples, the SRMs containing 0.5 g fish tissue (Contaminated Fish, Reference Material, EDF-2525, Cerilliant CIL, Inc. Texas, USA) were added  $\text{Na}_2\text{SO}_4$  in a ratio of 1:20. The PFAS analysis included SRMs of UNEP ILS (Sediment sample, Jar n° 072, 2016) for substrate and reference samples of Pike-perch sample (QM 03-2, Quasimeme; #7 and #18) for springtails. The analysis of PFASs in the samples was carried out twice to test for precision, as we expected low levels.

The recovery efficiency for chlorinated and brominated compounds ranged from 30–98% for substrate, springtails, blank and reference samples. The PFAS compounds were not included in statistical analyses, but reported, with recoveries ranging between 19–48% for substrate, and 26% for PFDoDA reported in springtails. Solvent blanks and SRMs had higher recovery for PFASs (50–70% for SRMs), indicating that the low recovery results were linked to difficulties with the matrix. For chlorinated and brominated compounds, the limit of detection (LOD) was defined as 3 times the method noise for each compound as average of all

samples of the same kind. When contamination was registered in the blank samples, the LOD was adjusted to the threefold of the found concentration. LODs for PFASs were set to 0.05 ng/g or 0.10 ng/g dry weight (d.w.) for substrate samples, and wet weight (w.w.) for springtail samples. Limit of quantification (LOQ) was set as  $3 \times \text{LOD}$  for PFASs, PCBs, PBDEs, DDTs. Some OCPs had a lower LOQ, set to  $1.6\text{--}2.6 \times \text{LOD}$ .

## **S5. Stable isotope analysis**

Samples (1.5 mg of substrate or springtails in Sn capsules) were combusted with  $\text{O}_2$  and  $\text{Cr}_2\text{O}_3$  at  $1700^\circ\text{C}$  in a Eurovector EA3028 element analyser.  $\text{NO}_x$  was reduced to  $\text{N}_2$  in a Cu oven at  $650^\circ\text{C}$ .  $\text{H}_2\text{O}$  was removed in a chemical trap of  $\text{Mg}(\text{ClO}_4)_2$  before separation of  $\text{N}_2$  and  $\text{CO}_2$  on a 2 m Poraplot Q GC column.  $\text{N}_2$  and  $\text{CO}_2$  are directly injected on-line to a Horizon Isotope Ratio Mass Spectrometer (IRMS) from Nu-Instruments, for determination of  $\delta^{13}\text{C}$  and  $\delta^{15}\text{N}$ . Isotopic composition was expressed as parts per mille differences by comparison with international standards; atmospheric  $\text{N}_2$  for nitrogen (IAEA-N-1 and IAEA-N-2), and Vienna PeeDee Belemnite (VDPB) for carbon (USGS-24 standard). The ratios of stable isotope were expressed as equation 1 and 2 for  $\delta^{15}\text{N}$  and  $\delta^{13}\text{C}$ , respectively:

$$\delta^{15}\text{N} = ((R_{\text{sample}}/R_{\text{standard}})-1) \times 1000 \quad (1),$$

where R is the ratio of  $^{15}\text{N}/^{14}\text{N}$ , and

$$\delta^{13}\text{C} = ((R_{\text{sample}}/R_{\text{standard}})-1) \times 1000 \quad (2),$$

where R is the ratio of  $^{13}\text{C}/^{12}\text{C}$ , respectively.



## **S6. Exclusion of PFAS:**

Besides PFOS, only few individual PFAS compounds were above the detection limit in several springtail and substrate samples (Table S2 and S3). This demonstrates either the low presence of PFASs compared to other organohalogen compounds occurring in terrestrial ecosystems, and/or reflects challenges in the chemical analyses. PFASs had low methodological recovery of internal standards of mainly the long-chained perfluorinated carboxylic acids (PFCAs) with a chain length of 10 carbons and longer (average 24% for substrate, and 38% for springtails). Thus, some uncertainty is linked to the analysis of these substances in substrate samples and we refer to the Supporting Information for illustration of PFASs relative concentrations (Figure S4). The good fit with standard reference materials and very limited contributions by method blanks indicated that the laboratory procedures were satisfactory. The low recovery of PFASs internal standards indicated therefore that both matrices require further optimizing of the extraction techniques prior to analysis and our data have to be considered semiquantitative for PFAS compounds.

## **S7. Principal component analyses:**

All compounds in the PCA on contaminant concentrations in springtails (Figure S2) were negatively correlated or uncorrelated with  $\delta^{15}\text{N}$  and with *Lipid*. Of the total variation, 10% was conditioned by the covariate *Lipid*, which was therefore included as a covariate in the final RDA. Increasing concentrations with decreasing  $\delta^{15}\text{N}$  explained 31% of the constrained variation in contamination in *H. viatica* (RDA, permutation test,  $p=0.003$ ). Thus, in springtails, the concentrations of several chlorinated and brominated compounds, e.g. HCB, chlordanes, high-chlorinated PCBs, BDEs, and *p,p'*-DDE decreased with increasing seabird influence. These surprising findings suggest complex dynamics within soil systems, such as bioavailability, and should be further studied.

The concentrations of *p,p'*-DDE in substrate (Figure S1), representing also  $\alpha$ -HCH, PCB-52, BDE-206, BDE-209, *trans* chlordanes and  $\gamma$ -HCH, was positively associated with  $\alpha$ -HCH, BDE-209 and *p,p'*-DDE in *H. viatica* (Figure S2). The *trans*-nonachlor concentrations in substrate (*t-NC (substrate)*), representing the clustering of *cis*-chlordanes, HCB, *trans*-nonachlor, *cis*-nonachlor and PCB-180 and was positively correlated with all chlordanes, low-chlorinated PCBs and HCHs in *H. viatica*. This vector is positioned along PC1, and thereby accounts for the most variation. Although this could indicate bioaccumulation of contaminants in springtails to a certain degree, the last substrate representative (*PCB-153 (substrate)*) representing the concentrations of high-chlorinated PCBs was negative correlated or uncorrelated with all compounds detected in *H. viatica*. These unclear findings can possibly reflect the variation in bioavailability between sites.

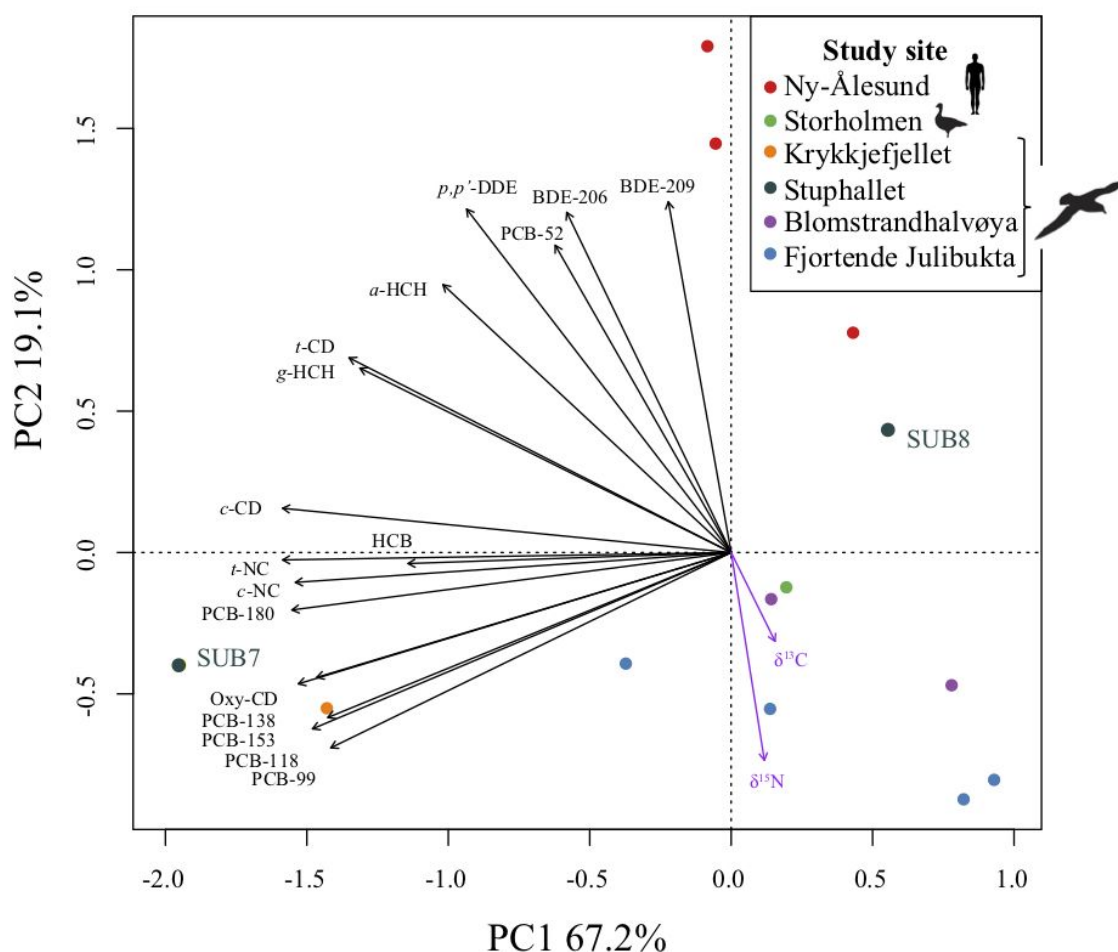

Figure S1. Principal component analyses (PCA) triplot of intercorrelations between logarithmically transformed contaminant concentrations in substrate (pg/g d.w.). Response loadings (contaminants) are projected onto the plot as black arrows, and passive explanatory variables of stable isotope ratios ( $\delta^{13}\text{C}$  and  $\delta^{15}\text{N}$ ) (purple arrows) did not influence the scores of samples or loadings of responses. The extracted variance (% of total variance) per principal component is given on each axis. Abbreviations: Oxy-CD=oxychlordane,  $t$ -CD=*trans* chlordane,  $c$ -CD=*cis* chlordane,  $t$ -NC=*trans* nonachlor,  $c$ -NC=*cis* nonachlor, HCB=hexachlorobenzene, HCH=hexachlorocyclohexane, BDE=congener of polybrominated diphenyl ether, PCB=polychlorinated biphenyl, DDE=dichlorodiphenyldichloroethylene. Symbols indicate the *a priori* ranking of study sites: human-affected (low seabird influence); terrestrial birds (medium seabird influence) and high seabird influence.

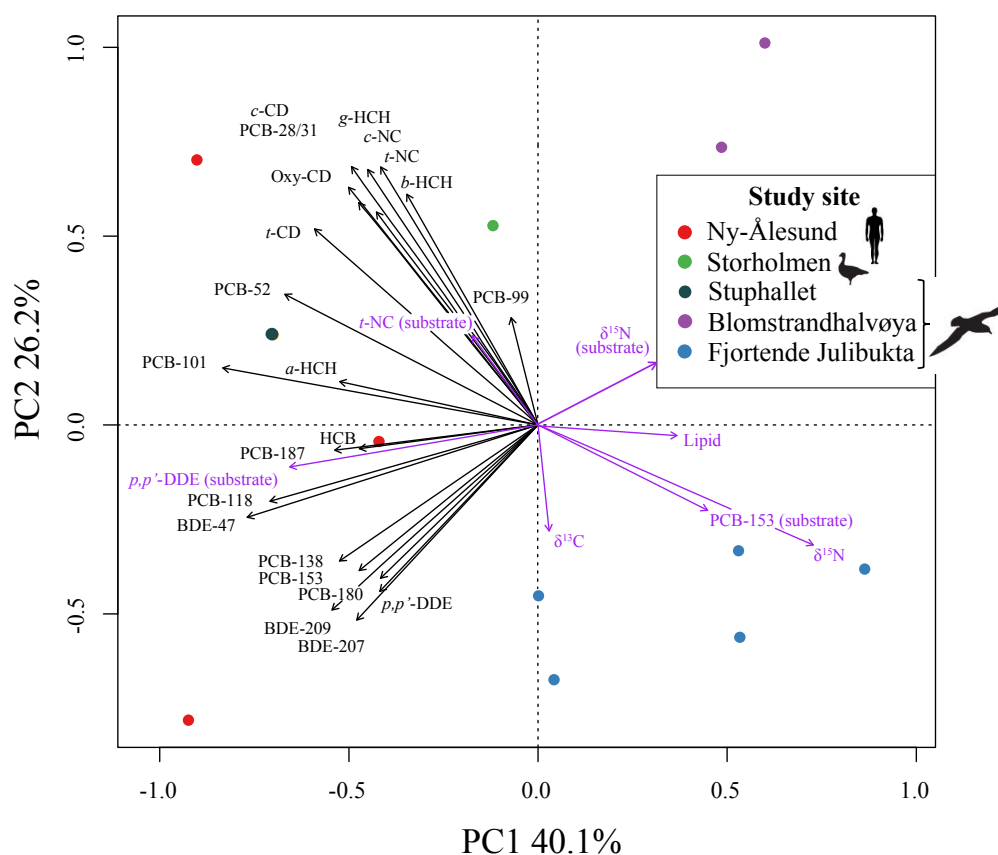

Figure S2. Principal component analyses (PCA) triplot of intercorrelations between logarithmically transformed contaminant concentrations in *Hypogastrura viatica* (pg/g w.w.). Response loadings (contaminants) are projected onto the plot as black arrows, and the passive explanatory variables (purple arrows) did not influence the scores of samples or response loadings. Passive variables include stable isotope ratios ( $\delta^{13}\text{C}$  and  $\delta^{15}\text{N}$ ) in springtails and  $\delta^{15}\text{N}$  in substrate. The logarithmically transformed concentrations of PCB-153, *t*-NC and *p,p'*-DDE in substrate represent clusters in the substrate PCA (Figure S1). The extracted variance (% of total variance) per principal component is given on each axis. Abbreviations: Oxy-CD=oxychlordane, *t*-CD=*trans* chlordane, *c*-CD=*cis* chlordane, *t*-NC=*trans* nonachlor, *c*-NC=*cis* nonachlor, HCB=hexachlorobenzene, HCH=hexachlorocyclohexane, BDE=congener of polybrominated diphenyl ether, PCB=polychlorinated biphenyl, DDE=dichlorodiphenyldichloroethylene. Symbols indicate the *a priori* seabird influence ranking of study sites: human-affected (low); terrestrial birds (medium) and high seabird influence.

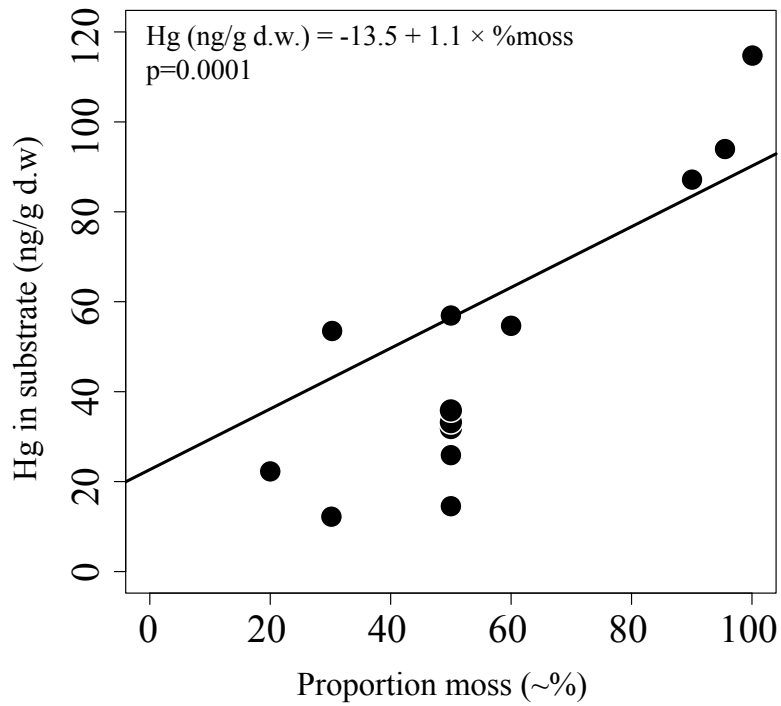

Figure S3. Linear relationship between approximate proportion of moss in substrate sample materials and the concentrations of Hg (ng/g d.w.) in substrate.

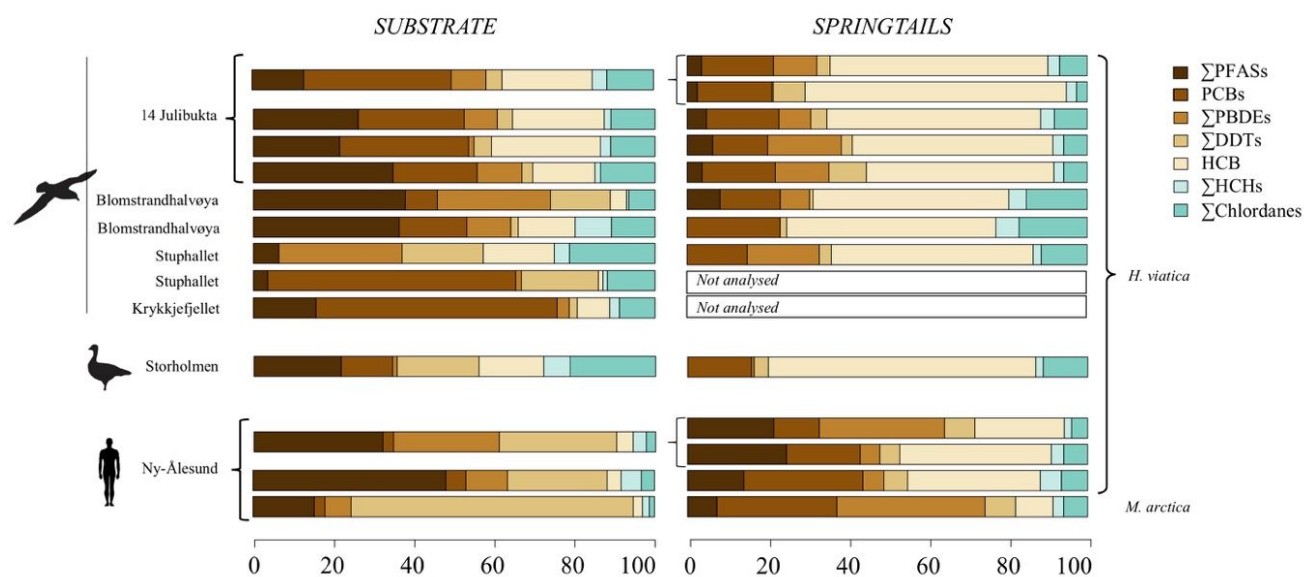

Figure S4. Relative proportions of organic contaminant groups to the sum ( $\Sigma$ ) of all groups in substrates (left panel) and springtails (right panel). Samples of substrates are presented horizontal to their respective springtail sample. Note that springtails from Storholmen was not analysed for per- and polyfluoroalkyl substances (PFASs) due to insufficient sample material. In Fjortende Julibukta and Ny-Ålesund, two springtail samples were collected along with one substrate sample, indicated on the figure. Abbreviations: PCBs=polychlorinated biphenyls, PBDEs=polybrominated diphenyl ethers, DDT=dichlorodiphenyltrichloroethane and its metabolites, HCB=hexachlorobenzene, HCH=hexachlorocyclohexanes, Chlordanes=chlordane and its metabolites.

|                                                                                                                                                                                                                                                       | Location            | Springtail sample-ID | Springtail Species | Substrate sample-ID | Substrate content                                | Distance from seabird colony      | Site description              |
|-------------------------------------------------------------------------------------------------------------------------------------------------------------------------------------------------------------------------------------------------------|---------------------|----------------------|--------------------|---------------------|--------------------------------------------------|-----------------------------------|-------------------------------|
|                                                                                                                                                                      | Ny-Ålesund          | MA1                  | <i>M. arctica</i>  | SUB1                | 60% moss, 40% soil<br>(with cyanobacteria layer) | 50-200 m from research settlement | Wet area, pond by the beach   |
|                                                                                                                                                                                                                                                       | Ny-Ålesund          | HV2                  | <i>H. viatica</i>  | SUB2/3              | 20% moss, 80% soil<br>(with cyanobacteria layer) | 50-200 m from research settlement | Wet area, pond by the beach   |
|                                                                                                                                                                                                                                                       | Ny-Ålesund          | HV3                  | <i>H. viatica</i>  |                     |                                                  | 50-200 m from research settlement | Wet area, pond by the beach   |
|                                                                                                                                                                                                                                                       | Ny-Ålesund          | HV4                  | <i>H. viatica</i>  | SUB4                | 50% moss, 50% soil                               | 50-200 m from research settlement | Wet area, pond by the beach   |
| <br><br>                                                                          | Storholmen          | HV5                  | <i>H. viatica</i>  | SUB5                | 100% moss                                        | Centre of Storholmen island       | Flat ground, wet area         |
|                                                                                                                                                                                                                                                       | Krykkjefjellet      | MA6                  | <i>M. Arctica</i>  | SUB6                | 90% moss, 10% soil                               | 0-2 m from seabird colony         | In the slope                  |
|                                                                                                                                                                                                                                                       | Stuphallet          | MA7                  | <i>M. Arctica</i>  | SUB7                | 50% moss, 50% soil                               | 0-2 m from seabird colony         | In the slope                  |
|                                                                                                                                                                                                                                                       | Stuphallet          | HV8                  | <i>H. viatica</i>  | SUB8                | 50% moss, 50% soil                               | 250 m from seabird colony         | Bottom of the slope, wet area |
|                                                                                                                                                                                                                                                       | Blomstrandøya       | HV9                  | <i>H. viatica</i>  | SUB9                | 95% moss, 5% soil<br>(with cyanobacteria layer)  | 150 m from seabird colony         | In the slope                  |
|                                                                                                                                                                                                                                                       | Blomstrandøya       | HV10                 | <i>H. viatica</i>  | SUB10               | 50% moss, 50% soil<br>(with cyanobacteria layer) | 400 m from seabird colony         | Bottom of the slope, wet area |
|                                                                                                                                                                                                                                                       | Fjortende Julibukta | HV11                 | <i>H. viatica</i>  | SUB11               | 30% moss, 70% soil                               | 130-150 m from seabird colony     | Bottom of the slope, wet area |
|                                                                                                                                                                                                                                                       | Fjortende Julibukta | HV12                 | <i>H. viatica</i>  | SUB12               | 30% moss, 70% soil                               | 130-150 m from seabird colony     | Bottom of the slope, wet area |
|                                                                                                                                                                                                                                                       | Fjortende Julibukta | HV13                 | <i>H. viatica</i>  | SUB13/14            | 50% moss, 50% soil                               | 130-150 m from seabird colony     | Bottom of the slope, wet area |
|                                                                                                                                                                                                                                                       | Fjortende Julibukta | HV14                 | <i>H. viatica</i>  |                     | 50% moss, 50% soil                               | 130-150 m from seabird colony     | Bottom of the slope, wet area |
|                                                                                                                                                                                                                                                       | Fjortende Julibukta | HV15                 | <i>H. viatica</i>  | SUB15               | 50% moss, 50% soil                               | 130-150 m from seabird colony     | Bottom of the slope, wet area |
| Substrate sample SUB13/14 is parallel to springtail samples HV13 and HV14. Substrate sample SUB2/3 is parallel to springtail samples HV2 and HV3. Distance from bird cliffs are approximate and retrieved using TopoSvalbard (toposvalbard.npolar.no) |                     |                      |                    |                     |                                                  |                                   |                               |

289 Table S2. Raw data of contaminant concentrations in substrate (soil/moss).

290

291

| Study site          | Ny-Ålesund  |        |       |  Storholmen | Krykkje-fjellet | Stuphallet |       |  Blomstrandhalvøya |       | Fjortende Julibukta |       |          |       | LOD  | LOQ       |
|---------------------|----------------------------------------------------------------------------------------------|--------|-------|----------------------------------------------------------------------------------------------|-----------------|------------|-------|-------------------------------------------------------------------------------------------------------|-------|---------------------|-------|----------|-------|------|-----------|
| Substrate sample ID | SUB1                                                                                         | SUB2/3 | SUB4  | SUB5                                                                                         | SUB6            | SUB7       | SUB8  | SUB9                                                                                                  | SUB10 | SUB11               | SUB12 | SUB13/14 | SUB15 |      |           |
| Compounds           |                                                                                              |        |       |                                                                                              |                 |            |       |                                                                                                       |       |                     |       |          |       |      |           |
| pg/g d.w.           |                                                                                              |        |       |                                                                                              |                 |            |       |                                                                                                       |       |                     |       |          |       |      | pg/g d.w. |
| <b>Hg</b>           | 55020                                                                                        | 22078  | 31796 | 115219                                                                                       | 87244           | 36024      | 26146 | 93965                                                                                                 | 14895 | 12013               | 52633 | 34061    | 56152 |      |           |
| <b>PFHxS</b>        | 60.0                                                                                         | 59.4   | <LOD  | <LOD                                                                                         | <LOD            | <LOD       | <LOD  | <LOD                                                                                                  | <LOD  | <LOD                | <LOD  | <LOD     | <LOD  | 50   | 150       |
| <b>PFNS</b>         | <LOD                                                                                         | <LOD   | <LOD  | <LOD                                                                                         | <LOD            | <LOD       | <LOD  | <LOD                                                                                                  | <LOD  | <LOD                | <LOD  | <LOD     | 130   | 50   | 150       |
| <b>Σ PFOS</b>       | 1724                                                                                         | 1958   | 3810  | <LOD                                                                                         | 1164            | 539        | <LOD  | 208                                                                                                   | <LOD  | 144                 | <LOD  | 63.6     | 183   | 50   | 150       |
| <b>PFOA</b>         | 105                                                                                          | <LOD   | 81.3  | <LOD                                                                                         | 351             | 161        | 98.7  | 203                                                                                                   | 567   | 158                 | 297   | 92.2     | 184   | 50   | 150       |
| <b>PFNA</b>         | 162                                                                                          | <LOD   | <LOD  | 372                                                                                          | 512             | 146        | <LOD  | 253                                                                                                   | 523   | 61.7                | 145   | 63.0     | <LOD  | 50   | 150       |
| <b>PFDA</b>         | <LOD                                                                                         | <LOD   | <LOD  | <LOD                                                                                         | 184             | 120        | <LOD  | 168                                                                                                   | <LOD  | <LOD                | <LOD  | <LOD     | <LOD  | 50   | 150       |
| <b>PFUnDA</b>       | <LOD                                                                                         | <LOD   | <LOD  | <LOD                                                                                         | 460             | 207        | <LOD  | <LOD                                                                                                  | <LOD  | <LOD                | <LOD  | <LOD     | <LOD  | 50   | 150       |
| pg/g w.w.           |                                                                                              |        |       |                                                                                              |                 |            |       |                                                                                                       |       |                     |       |          |       |      | pg/g w.w. |
| <b>PCB 28/31</b>    | <LOD                                                                                         | <LOD   | <LOD  | 6.74                                                                                         | 14.4            | 22.4       | <LOD  | 7.25                                                                                                  | <LOD  | <LOD                | <LOD  | 11.0     | 8.77  | 3.27 | 9.81      |
| <b>PCB 52</b>       | 39.6                                                                                         | 9.5    | 15.0  | <LOD                                                                                         | 20.1            | 32.9       | <LOD  | <LOD                                                                                                  | 26.9  | <LOD                | 9.10  | 9.25     | 8.20  | 7.82 | 23.5      |
| <b>PCB 99</b>       | <LOD                                                                                         | 4.3    | 4.54  | <LOD                                                                                         | 174             | 703        | <LOD  | 4.37                                                                                                  | 8.64  | 6.64                | 10.5  | 14.8     | 16.4  | 3.16 | 9.48      |
| <b>PCB 101</b>      | <LOD                                                                                         | 7.9    | 10.2  | <LOD                                                                                         | 57.0            | 435        | <LOD  | 4.65                                                                                                  | <LOD  | <LOD                | 7.55  | <LOD     | 5.37  | 3.67 | 11.0      |
| <b>PCB 105</b>      | <LOD                                                                                         | <LOD   | <LOD  | <LOD                                                                                         | 102             | 624        | <LOD  | <LOD                                                                                                  | <LOD  | <LOD                | <LOD  | 4.98     | 10.0  | 4.84 | 14.5      |
| <b>PCB 118</b>      | <LOD                                                                                         | 6.0    | 6.46  | 8.32                                                                                         | 247             | 1720       | <LOD  | 8.59                                                                                                  | 5.90  | 10.3                | 13.8  | 18.7     | 26.7  | 4.39 | 13.2      |
| <b>PCB 138</b>      | 16.8                                                                                         | 11.7   | 10.3  | 14.5                                                                                         | 819             | 2660       | <LOD  | 14.8                                                                                                  | 7.29  | 17.3                | 27.8  | 29.2     | 54.0  | 3.50 | 10.5      |
| <b>PCB 153</b>      | 39.1                                                                                         | 15.2   | <LOD  | <LOD                                                                                         | 1240            | 4460       | <LOD  | 26.1                                                                                                  | 21.8  | 32.7                | 63.6  | 54.6     | 93.3  | 6.24 | 18.7      |
| <b>PCB 180</b>      | 37.0                                                                                         | <LOD   | 8.40  | 7.03                                                                                         | 587             | 2110       | <LOD  | 11.1                                                                                                  | 11.1  | 14.8                | 18.3  | <LOD     | 40.0  | 4.12 | 12.3      |
| <b>PCB 183</b>      | <LOD                                                                                         | <LOD   | <LOD  | <LOD                                                                                         | 100             | 299        | <LOD  | <LOD                                                                                                  | <LOD  | <LOD                | 3.53  | 11.3     | 7.09  | 3.45 | 10.4      |
| <b>PCB 187</b>      | 6.24                                                                                         | <LOD   | <LOD  | <LOD                                                                                         | 167             | 251        | <LOD  | 5.44                                                                                                  | <LOD  | 5.53                | 7.50  | 8.01     | 13.1  | 4.00 | 12.0      |
| <b>PCB 194</b>      | <LOD                                                                                         | <LOD   | <LOD  | <LOD                                                                                         | 106             | 280        | <LOD  | <LOD                                                                                                  | <LOD  | <LOD                | <LOD  | <LOD     | <LOD  | 6.72 | 20.1      |
| <b>PBDE 47</b>      | <LOD                                                                                         | <LOD   | <LOD  | <LOD                                                                                         | 42.3            | 78.9       | <LOD  | <LOD                                                                                                  | 5.1   | <LOD                | <LOD  | 6.8      | 5.2   | 1.2  | 3.5       |
| <b>PBDE 99</b>      | <LOD                                                                                         | 3.6    | <LOD  | <LOD                                                                                         | 23.2            | 21.2       | 2.8   | 2.4                                                                                                   | <LOD  | <LOD                | <LOD  | 3.6      | 3.5   | 1.2  | 3.6       |
| <b>PBDE 100</b>     | <LOD                                                                                         | <LOD   | <LOD  | 3.2                                                                                          | 7.0             | 7.4        | <LOD  | <LOD                                                                                                  | 13.4  | <LOD                | 5.1   | <LOD     | <LOD  | 1.0  | 2.9       |
| <b>PBDE 153</b>     | <LOD                                                                                         | <LOD   | <LOD  | <LOD                                                                                         | 5.2             | <LOD       | <LOD  | <LOD                                                                                                  | <LOD  | <LOD                | <LOD  | <LOD     | <LOD  | 1.1  | 3.2       |
| <b>PBDE 154</b>     | <LOD                                                                                         | <LOD   | <LOD  | <LOD                                                                                         | 5.2             | 9.2        | 2.0   | 2.2                                                                                                   | 2.3   | <LOD                | <LOD  | <LOD     | <LOD  | 1.1  | 3.2       |
| <b>PBDE 183</b>     | <LOD                                                                                         | 0.9    | 0.7   | <LOD                                                                                         | <LOD            | <LOD       | <LOD  | 4.6                                                                                                   | <LOD  | <LOD                | <LOD  | <LOD     | <LOD  | 3.7  | 11.0      |
| <b>PBDE 206</b>     | 10.0                                                                                         | 3.2    | 8.9   | <LOD                                                                                         | 5.6             | 8.6        | 3.4   | 4.3                                                                                                   | 3.6   | 0.9                 | 1.7   | 2.7      | 2.0   | 1.3  | 4.0       |
| <b>PBDE 207</b>     | 13.6                                                                                         | 5.3    | 12.9  | <LOD                                                                                         | 4.8             | 9.3        | <LOD  | <LOD                                                                                                  | <LOD  | <LOD                | <LOD  | <LOD     | <LOD  | 1.6  | 4.7       |
| <b>PBDE 209</b>     | 321                                                                                          | 99.5   | 520   | <LOD                                                                                         | 85.9            | 173        | 55.2  | 40.3                                                                                                  | 263   | 45.7                | <LOD  | 37.7     | 56.1  | 26   | 79        |

292

293



Table S2 continued. Raw data of contaminant concentrations in substrate (soil/moss).

| Study site             |  Ny-Ålesund |      |        |      |  Storholmen |  |      |      |                   |       |       |       |          |       | LOD       | LOQ  |
|------------------------|----------------------------------------------------------------------------------------------|------|--------|------|----------------------------------------------------------------------------------------------|-------------------------------------------------------------------------------------|------|------|-------------------|-------|-------|-------|----------|-------|-----------|------|
|                        | Substrate sample ID                                                                          | SUB1 | SUB2/3 | SUB4 | SUB5                                                                                         | Krykkje-<br>fjellet                                                                 | SUB7 | SUB8 | Blomstrandhalvøya | SUB10 | SUB11 | SUB12 | SUB13/14 | SUB15 |           |      |
| Compounds              |                                                                                              |      |        |      |                                                                                              |                                                                                     |      |      |                   |       |       |       |          |       |           |      |
| pg/g w.w.              |                                                                                              |      |        |      |                                                                                              |                                                                                     |      |      |                   |       |       |       |          |       | pg/g w.w. |      |
| <b>o,p'-DDT</b>        | <LOD                                                                                         | <LOD | <LOD   | <LOD | <LOD                                                                                         | <LOD                                                                                | 453  | <LOD | <LOD              | <LOD  | <LOD  | <LOD  | <LOD     | 5.6   | 16.9      |      |
| <b>p,p'-DDT</b>        | 107                                                                                          | <LOD | <LOD   | <LOD | <LOD                                                                                         | <LOD                                                                                | 1010 | <LOD | <LOD              | <LOD  | <LOD  | <LOD  | <LOD     | 7.9   | 23.7      |      |
| <b>o,p'-DDD</b>        | <LOD                                                                                         | <LOD | <LOD   | <LOD | <LOD                                                                                         | 14.7                                                                                | 62.9 | 4.65 | <LOD              | 21.9  | <LOD  | <LOD  | <LOD     | <LOD  | 2.6       | 7.9  |
| <b>p,p'-DDD</b>        | <LOD                                                                                         | 58.4 | 187    | 44.9 | <LOD                                                                                         | 593                                                                                 | 37.2 | <LOD | 115               | <LOD  | <LOD  | <LOD  | <LOD     | <LOD  | 9.6       | 28.8 |
| <b>o,p'-DDE</b>        | <LOD                                                                                         | <LOD | <LOD   | <LOD | <LOD                                                                                         | 10                                                                                  | <LOD | <LOD | <LOD              | <LOD  | <LOD  | <LOD  | <LOD     | 3.7   | 11.0      |      |
| <b>p,p'-DDE</b>        | 3604                                                                                         | 212  | 415    | 13.4 | 109                                                                                          | 2088                                                                                | <LOD | 8.82 | 15.3              | 11.2  | 21.9  | 23.3  | 30.6     | 8.1   | 24.2      |      |
| <b>HCB</b>             | 121                                                                                          | 38   | 84.6   | 46.1 | 489                                                                                          | 260                                                                                 | 36.5 | 69.3 | 41.6              | 64.5  | 137   | 140   | 173      | 7.0   | 14.6      |      |
| <b>a-HCH</b>           | 77.4                                                                                         | 49.4 | 59     | 5.5  | 89                                                                                           | 102                                                                                 | 5    | 15.1 | <LOD              | 3.7   | 8.2   | 6.3   | 12.1     | 0.4   | 1.2       |      |
| <b>b-HCH</b>           | n.d.                                                                                         | n.d. | n.d.   | 9.1  | 35.6                                                                                         | 94.9                                                                                | <LOD | 21.3 | <LOD              | <LOD  | <LOD  | <LOD  | 11.5     | 0.6   | 1.9       |      |
| <b>c-HCH</b>           | 11.9                                                                                         | 5.2  | 8.3    | 4.1  | 22.2                                                                                         | 42                                                                                  | 2.8  | 7.8  | 5.5               | 2.1   | 4.6   | 4     | 4.6      | 1.7   | 5.1       |      |
| <b>Oxychlordane</b>    | 34.3                                                                                         | 28   | 34.1   | 40.1 | 311                                                                                          | 1316                                                                                | 33.5 | 32.7 | 57.9              | 53.9  | 44.1  | 54.4  | 66       | 18.6  | 55.7      |      |
| <b>Trans chlordane</b> | 4.1                                                                                          | 1.2  | 1.6    | 1.9  | 15.4                                                                                         | 92.7                                                                                | 1.6  | 1.2  | 0.9               | 0.5   | 0.9   | 1.2   | 1.9      | 0.3   | 0.9       |      |
| <b>Cis chlordane</b>   | 12.8                                                                                         | 3.4  | 5.0    | 6.2  | 65                                                                                           | 277                                                                                 | 3.5  | 5.0  | 2.6               | 2.1   | 3.8   | 4     | 7.6      | 1.4   | 4.2       |      |
| <b>Trans nonachlor</b> | 11.7                                                                                         | 3.1  | 4.7    | 8.5  | 95                                                                                           | 608                                                                                 | 3.3  | 8.3  | 3.1               | <LOD  | 4.3   | 4.8   | 8.7      | 2.6   | 7.0       |      |
| <b>Cis nonachlor</b>   | 5.1                                                                                          | <LOD | 2.1    | 4.2  | 47.2                                                                                         | 312                                                                                 | 2.1  | 5.7  | 2.2               | <LOD  | 2.4   | 2.8   | 5.2      | 1.2   | 2.8       |      |
| <b>Mirex</b>           | <LOD                                                                                         | <LOD | <LOD   | <LOD | 50.4                                                                                         | 165                                                                                 | <LOD | <LOD | 8.6               | <LOD  | 5.7   | <LOD  | 5.6      | 4.1   | 12.2      |      |

Abbreviations: LOD = limit of detection, LOQ=limit of quantification, n.d. = not detected, d.w. = dry weight

Analyte abbreviations: Hg=mercury, PFHxS=perfluorohexane sulfonate, PFNS=perfluorodecane sulfonate, PFOS=perfluorooctanesulfaonic acid, PFOA=perfluorooctanoic acid, PFNA=perfluorononanoic acid, PFDA=perfluorodecanoic acid, PFUnDA=perfluoroundecanoic acid, PCB=polychlorinated biphenyl, PBDE=polybrominated diphenyl ether, DDT=dichlorodiphenyltrichloroethane, DDD=dichlorodiphenyldichloroethane, DDE=dichlorodiphenyldichloroethylene, and HCB=hexachlorobenzene, HCH=hexachlorocyclohexane.

PFAS congeners below LOD in all substrate samples (pg/g d.w., given in brackets): PFBS (50), PFHpS (50), PFDcS (50), PFHxA (100), PFHpA (100), PFDODA (100), PFTrDA (100), PFTeDA (100)

Other analytes below LOD in all substrate samples (pg/g w.w., given in brackets): PBDE-28 (10.4), PBDE-138 (1.10), PBDE-196 (1.10) and PBDE-197 (1.00)

Table S3. Raw data of contaminant concentrations in springtails.

301

302

| Study site           | Ny-Ålesund  |       |       |       | Storholmen  | Krykkjefjellet  | Stuphallet |       | Blomstrandhalvøya |       | Fjortende Julibukta |       |       |      |      | LOD  | LOQ       |
|----------------------|----------------------------------------------------------------------------------------------|-------|-------|-------|----------------------------------------------------------------------------------------------|----------------------------------------------------------------------------------------------------|------------|-------|-------------------|-------|---------------------|-------|-------|------|------|------|-----------|
| Springtail sample ID | MA1                                                                                          | HV2   | HV3   | HV4   | HV5                                                                                          | MA6                                                                                                | MA7        | HV8   | HV9               | HV10  | HV11                | HV12  | HV13  | HV14 | HV15 |      |           |
| Compounds            |                                                                                              |       |       |       |                                                                                              |                                                                                                    |            |       |                   |       |                     |       |       |      |      |      |           |
| pg/g d.w.            |                                                                                              |       |       |       |                                                                                              |                                                                                                    |            |       |                   |       |                     |       |       |      |      |      |           |
| <b>Hg</b>            | 49752                                                                                        | 12988 | 18228 | 11021 | 15577                                                                                        | 88644                                                                                              | n.a.       | 19830 | 13747             | 13081 | 13012               | 10655 | 10616 | 9732 | 9309 |      |           |
| pg/g w.w.            |                                                                                              |       |       |       |                                                                                              |                                                                                                    |            |       |                   |       |                     |       |       |      |      |      | pg/g w.w. |
| <b>ΣPFOS</b>         | 408                                                                                          | 1085  | 1975  | 2634  | n.a.                                                                                         | 77.4                                                                                               | n.a.       | n.a.  | <LOD              | <LOD  | <LOD                | 115   | <LOD  | <LOD | <LOD | 50   | 150       |
| <b>PFNA</b>          | <LOD                                                                                         | 68.3  | 56    | <LOD  | n.a.                                                                                         | 91.3                                                                                               | n.a.       | n.a.  | <LOD              | 94.3  | <LOD                | 55.3  | <LOD  | 50.6 | <LOD | 50   | 150       |
| <b>PFDA</b>          | <LOD                                                                                         | <LOD  | <LOD  | <LOD  | n.a.                                                                                         | <LOD                                                                                               | n.a.       | n.a.  | <LOD              | <LOD  | <LOD                | <LOD  | 60.1  | <LOD | <LOD | 50   | 150       |
| <b>PFUnDA</b>        | 65.7                                                                                         | 88.2  | 66.7  | 55.1  | n.a.                                                                                         | 15.7                                                                                               | n.a.       | n.a.  | <LOD              | 86.7  | <LOD                | 52.6  | <LOD  | <LOD | <LOD | 50   | 150       |
| <b>PFDoDA</b>        | <LOD                                                                                         | 55.3  | 95.4  | 162   | n.a.                                                                                         | 86.7                                                                                               | n.a.       | n.a.  | <LOD              | 214   | 260                 | 179   | 137   | 65.9 | 196  | 50   | 150       |
| <b>PCB 28/31</b>     | 73.5                                                                                         | 903   | 116   | 134   | 219                                                                                          | n.a.                                                                                               | n.a.       | 349   | 236               | 175   | 80.2                | 169   | 61.9  | 80.8 | 179  | 11.4 | 34.3      |
| <b>PCB 52</b>        | 320                                                                                          | 666   | 295   | 289   | 180                                                                                          | n.a.                                                                                               | n.a.       | 287   | 164               | 140   | 105                 | 131   | <LOD  | 149  | 153  | 71.5 | 214       |
| <b>PCB 99</b>        | 89.2                                                                                         | 137   | 242   | 137   | 101                                                                                          | n.a.                                                                                               | n.a.       | 85.1  | 57.5              | 54.4  | 223                 | 64.1  | 60    | 121  | 73.7 | 26.7 | 80.2      |
| <b>PCB 101</b>       | 153                                                                                          | 242   | 222   | 222   | 84.5                                                                                         | n.a.                                                                                               | n.a.       | 143   | 63.0              | 75.4  | 106                 | 64    | 38.1  | <LOD | 59.9 | 31.0 | 93.2      |
| <b>PCB 105</b>       | 49.8                                                                                         | 46.5  | 82.7  | <LOD  | <LOD                                                                                         | n.a.                                                                                               | n.a.       | 23.0  | <LOD              | <LOD  | 26.4                | <LOD  | 26.2  | 49.8 | <LOD | 21.9 | 65.6      |
| <b>PCB 118</b>       | 168                                                                                          | 145   | 137   | 144   | 136                                                                                          | n.a.                                                                                               | n.a.       | 118   | 66.5              | 61.5  | 145                 | 80.5  | 94.2  | 78.4 | 96.2 | 19.6 | 58.8      |
| <b>PCB 138</b>       | 288                                                                                          | 180   | 138   | 169   | 158                                                                                          | n.a.                                                                                               | n.a.       | 101   | 77.4              | 65.4  | 171                 | 107   | 128   | 110  | 120  | 38.5 | 115       |
| <b>PCB 153</b>       | 516                                                                                          | 295   | 303   | 299   | 245                                                                                          | n.a.                                                                                               | n.a.       | 166   | 162               | 135   | 314                 | 198   | 233   | 199  | 216  | 60.7 | 182       |
| <b>PCB 180</b>       | 160                                                                                          | 68.3  | 53.0  | 60.4  | 69.3                                                                                         | n.a.                                                                                               | n.a.       | 36.4  | <LOD              | <LOD  | 56.2                | 45.9  | 55.7  | 40.1 | 56.1 | 32.4 | 97.1      |
| <b>PCB 183</b>       | 39.6                                                                                         | 19.5  | 17.1  | <LOD  | <LOD                                                                                         | n.a.                                                                                               | n.a.       | <LOD  | <LOD              | <LOD  | 15.9                | <LOD  | 14.6  | 15.9 | <LOD | 13.7 | 41.1      |
| <b>PCB 187</b>       | 79.1                                                                                         | 36.7  | 23.7  | 47.3  | <LOD                                                                                         | n.a.                                                                                               | n.a.       | 24.3  | 17.1              | 17.3  | 26.6                | <LOD  | 23.1  | <LOD | 22.4 | 15.5 | 46.5      |
| <b>PBDE 47</b>       | 133                                                                                          | 109   | 111   | 110   | 32.3                                                                                         | n.a.                                                                                               | n.a.       | 38.4  | <LOD              | <LOD  | 28.3                | 36.6  | 34.6  | <LOD | <LOD | 7    | 22        |
| <b>PBDE 100</b>      | 11.6                                                                                         | 14.6  | <LOD  | 24.7  | <LOD                                                                                         | n.a.                                                                                               | n.a.       | <LOD  | <LOD              | <LOD  | 19.9                | <LOD  | <LOD  | <LOD | <LOD | 10   | 31        |
| <b>PBDE 154</b>      | <LOD                                                                                         | <LOD  | <LOD  | <LOD  | <LOD                                                                                         | n.a.                                                                                               | n.a.       | <LOD  | <LOD              | <LOD  | <LOD                | 14.9  | 3.3   | <LOD | <LOD | 10   | 29        |
| <b>PBDE 206</b>      | 118                                                                                          | <LOD  | <LOD  | 75.6  | <LOD                                                                                         | n.a.                                                                                               | n.a.       | 76.8  | <LOD              | <LOD  | <LOD                | 54.9  | <LOD  | <LOD | 23.6 | 8    | 25        |
| <b>PBDE 207</b>      | 99.4                                                                                         | 14.3  | 11    | 107   | 21.9                                                                                         | n.a.                                                                                               | n.a.       | 75.6  | <LOD              | 12.1  | 20.6                | 66.1  | 12.7  | 15.7 | 24.9 | 10   | 29        |
| <b>PBDE 209</b>      | 2029                                                                                         | 343   | 312   | 3820  | <LOD                                                                                         | n.a.                                                                                               | n.a.       | 1411  | <LOD              | 341   | 863                 | 980   | 273   | <LOD | 541  | 201  | 603       |

303

304

305

Table S3 continued. Raw data of contaminant concentrations in springtails.

| Study site<br>Springtail sample ID | Ny-Ålesund |      |      |      | Storholmen | Krykkje-<br>fjellet | Stuphallet |      | Blomstrandhalvøya |      | Fjortende Julibukta |      |      |      |      | LOD       | LOQ  |
|------------------------------------|------------|------|------|------|------------|---------------------|------------|------|-------------------|------|---------------------|------|------|------|------|-----------|------|
|                                    | MA1        | HV2  | HV3  | HV4  | HV5        | MA6                 | MA7        | HV8  | HV9               | HV10 | HV11                | HV12 | HV13 | HV14 | HV15 |           |      |
| Compounds<br>pg/g w.w.             |            |      |      |      |            |                     |            |      |                   |      |                     |      |      |      |      | pg/g w.w. |      |
| <b>o,p'-DDT</b>                    | 75.5       | 205  | 209  | 340  | 27.6       | n.a.                | n.a.       | 27.6 | <LOD              | <LOD | <LOD                | <LOD | 18.1 | <LOD | <LOD | 18.0      | 54.1 |
| <b>p,p'-DDT</b>                    | 58.9       | 64.4 | <LOD | <LOD | 69.3       | n.a.                | n.a.       | 69.3 | <LOD              | <LOD | 341                 | 73.4 | <LOD | <LOD | <LOD | 26.5      | 79.5 |
| <b>o,p'-DDD</b>                    | <LOD       | 27.6 | <LOD | <LOD | <LOD       | n.a.                | n.a.       | <LOD | <LOD              | <LOD | <LOD                | <LOD | <LOD | <LOD | <LOD | 12.0      | 35.9 |
| <b>p,p'-DDD</b>                    | <LOD       | <LOD | <LOD | 462  | 38.9       | n.a.                | n.a.       | 38.9 | 15.7              | <LOD | 136                 | <LOD | 49.3 | 102  | 72   | 15.1      | 45.3 |
| <b>o,p'-DDE</b>                    | 21.7       | 41.4 | <LOD | <LOD | <LOD       | n.a.                | n.a.       | <LOD | <LOD              | <LOD | <LOD                | <LOD | <LOD | <LOD | <LOD | 14.0      | 42.1 |
| <b>p,p'-DDE</b>                    | 337        | 211  | 230  | 201  | 128        | n.a.                | n.a.       | 128  | 44.9              | 41.9 | 172                 | 101  | 98   | 258  | 108  | 19.0      | 57.1 |
| <b>HCB</b>                         | 603        | 3052 | 3355 | 2953 | 5000       | n.a.                | n.a.       | 4478 | 1896              | 2353 | 3252                | 3139 | 2171 | 2960 | 2956 | 67.2      | 161  |
| <b>a-HCH</b>                       | 113        | 324  | 238  | 203  | 71.6       | n.a.                | n.a.       | 108  | 138               | 141  | 120                 | 125  | 103  | 89.8 | 128  | 3.4       | 10.2 |
| <b>b-HCH</b>                       | 19.5       | 79.2 | <LOD | <LOD | 26.9       | n.a.                | n.a.       | 20.5 | 18.4              | 22.3 | 17.7                | 10.9 | 11.6 | <LOD | <LOD | 8.2       | 24.6 |
| <b>c-HCH</b>                       | 40.2       | 84   | 38.7 | 37.1 | 41.3       | n.a.                | n.a.       | 49.3 | 53.5              | 46.9 | 34                  | 35.6 | 23   | 26.4 | 31   | 15.8      | 36.5 |
| <b>Oxychlordane</b>                | 287        | 296  | 265  | 267  | 396        | n.a.                | n.a.       | 461  | 301               | 357  | 260                 | 239  | 216  | <LOD | 242  | 202       | 364  |
| <b>Trans chlordane</b>             | 5.6        | 24.3 | 24.4 | 24.9 | 30.8       | n.a.                | n.a.       | 45.8 | 18                | 26.6 | 11.5                | 10.5 | 9    | 10.1 | 10.4 | 5.0       | 11.4 |
| <b>Cis chlordane</b>               | 23.6       | 110  | 99.4 | 99.4 | 128        | n.a.                | n.a.       | 201  | 109               | 138  | 54.1                | 48.4 | 42.8 | 41.8 | 49.2 | 15.3      | 26.9 |
| <b>Trans nonachlor</b>             | 44.8       | 106  | 88.4 | 88.4 | 167        | n.a.                | n.a.       | 194  | 121               | 133  | 51.6                | 46.7 | 44.2 | 46.9 | 47.3 | 30.3      | 73.0 |
| <b>Cis nonachlor</b>               | 25.9       | 65.9 | 50.7 | 50.7 | 110        | n.a.                | n.a.       | 119  | 69                | 78.2 | 30.2                | 23.3 | 23.1 | 21.9 | 24.8 | 13.9      | 31.8 |

Springtail sample-ID reflect species; MA=*M. arctica*, and HV=*H. viatica*. Abbreviations: LOD=limit of detection, LOQ=limit of quantification, n. a.=not analysed, d.w.=dry weight, w.w.=wet weight

Analyte abbreviations: Hg=mercury, PFOS=perfluorooctanesulfonic acid, PFNA=perfluorononanoic acid, PFDA=perfluorodecanoic acid, PFUnDA=perfluoroundecanoic acid, PFDoDA=perfluorododecanoic acid, PCB=polychlorinated biphenyl, PBDE=polybrominated diphenyl ether, DDT=dichlorodiphenyltrichloroethane, DDD=dichlorodiphenyldichloroethane, DDE=dichlorodiphenyldichloroethylene, and HCB=hexachlorobenzene, HCH=hexachlorocyclohexane.

PFAS congeners below LOD in all springtail samples (pg/g w.w., given in brackets) (not analysed in HV5, MA7 and HV): PFBS, PFHxS (50), PFHpS, PFNS, PFDcS, PFHxA, PFHpA, PFOA, PFTrDA, PFTeDA (100).

Other analytes below LOD in all springtail samples (pg/g w.w., given in brackets) (not analysed in MA6 and MA7): PCB-194 (41.26), PBDE-28 (206), PBDE-138 (9.8), PBDE-153 (9.1), PBDE-183 (18.8), PBDE-196 (7.7), PBDE-197 (7.1), Mirex (78.1)

312   **References:**

- 313   1.     Powley, C.R., S.W. George, T.W. Ryan, and R.C. Buck, *Matrix effect-free analytical*  
314         *methods for determination of perfluorinated carboxylic acids in environmental*  
315         *matrixes*. Analytical Chemistry, 2005. **77**(19): p. 6353-6358.
- 316   2.     Hanssen, L., A.A. Dudarev, S. Huber, J.O. Odland, E. Nieboer, and T.M. Sandanger,  
317         *Partition of perfluoroalkyl substances (PFASs) in whole blood and plasma, assessed*  
318         *in maternal and umbilical cord samples from inhabitants of arctic Russia and*  
319         *Uzbekistan*. Science of the Total Environment, 2013. **447**: p. 430-437.

320

321
